# Supplementary material
Source: PubMed Central journal article supplement (PMC7003305)
Supplement: ASN.2019050502SupplementaryData1.pdf [file ASN.2019050502SupplementaryData1.pdf]

## SUPPLEMENTAL TABLES

### Supplemental material table of contents

Supplemental table 1a (S1a). Baseline characteristics of sickle cell trait sensitivity analysis cohort.

Supplemental table 1b (S1b). Baseline characteristics of sickle cell disease sensitivity analysis cohort.

Supplemental table 2 (S2). Difference in mean eGFR change per year in sickle cell trait and sickle cell disease using sensitivity analysis cohort.

Supplemental table 3 (S3). Baseline characteristics of cohort with baseline eGFR  $\geq 65$  ml/min/1.73m<sup>2</sup>

Supplemental table 4 (S4). Association of sickle cell trait and sickle cell disease with incident stage 3 chronic kidney disease using sensitivity analysis cohort.

Supplemental table 5 (S5). Unadjusted and adjusted coefficients of the difference in mean eGFR change per year in sickle cell disease by severity.

Supplemental table 6 (S6). Adjusted coefficients describing mean annual change in eGFR by baseline eGFR category in reference, sickle cell trait, and sickle cell disease patients.

### S1a. Baseline characteristics of sickle cell trait sensitivity analysis cohort.

| Variable                                  | Reference<br>N = 2,450 | SCT<br>N = 1,240 | p value |
|-------------------------------------------|------------------------|------------------|---------|
| <b>Demographics</b>                       |                        |                  |         |
| Mean age (SD), years                      | 40 ( $\pm 14$ )        | 40 ( $\pm 14$ )  | 0.63    |
| Age $\geq 65$ years                       | 7%                     | 7%               | 0.72    |
| Female                                    | 79%                    | 78%              | 0.88    |
| Median follow up (IQR), years             | 9 (5 to 12)            | 8 (5 to 12)      | 0.70    |
| <b>Comorbidities</b>                      |                        |                  |         |
| Hypertension                              | 27%                    | 30%              | 0.06    |
| Diabetes mellitus                         | 23%                    | 25%              | 0.15    |
| Cardiovascular disease                    | 14%                    | 14%              | 0.82    |
| Smoking                                   |                        |                  | $<0.01$ |
| <i>Never</i>                              | 49%                    | 44%              |         |
| <i>Ever</i>                               | 16%                    | 14%              |         |
| <i>Missing</i>                            | 35%                    | 41%              |         |
| AKI                                       | 11.4%                  | 12.3%            | 0.42    |
| <b>Medications</b>                        |                        |                  |         |
| ACEi/ARBs                                 | 26%                    | 29%              | 0.16    |
| Aspirin                                   | 4%                     | 4%               | 0.76    |
| Statins                                   | 22%                    | 23%              | 0.61    |
| Hydroxyurea                               | 0.3%                   | 0.3%             | 0.85    |
| <b>Laboratory values</b>                  |                        |                  |         |
| Mean eGFR (SD), ml/min/1.73m <sup>2</sup> | 108 ( $\pm 27$ )       | 104 ( $\pm 27$ ) | $<0.01$ |
| eGFR categories                           |                        |                  | $<0.01$ |

|                                                                       |             |             |       |
|-----------------------------------------------------------------------|-------------|-------------|-------|
| $\geq 120 \text{ ml/min/1.73m}^2$                                     | 36%         | 30%         |       |
| 90 – 119 ml/min/1.73m <sup>2</sup>                                    | 38%         | 40%         |       |
| 60 – 89 ml/min/1.73m <sup>2</sup>                                     | 21%         | 25%         |       |
| 30 – 60 ml/min/1.73m <sup>2</sup>                                     | 5%          | 5%          |       |
| Urine ACR                                                             |             |             | 0.48  |
| <30mg/g                                                               | 3%          | 3%          |       |
| 30-299mg/g                                                            | 1%          | 1%          |       |
| >300mg/g                                                              | 0%          | 0%          |       |
| Missing                                                               | 96%         | 96%         |       |
| Mean hemoglobin*(SD),<br>g/dL                                         | 12.4 (±1.7) | 12.6 (±1.7) | 0.04  |
| Mean leukocyte count<br>(SD)*, x10 <sup>5</sup> cells/mm <sup>3</sup> | 7.5 (±3.9)  | 7.2 (±3.0)  | 0.03  |
| Hemoglobin electrophoresis<br>indications                             |             |             | <0.01 |
| <i>Anemia</i>                                                         | 47.6%       | 24.4%       |       |
| <i>Perinatal testing</i>                                              | 40.8%       | 38.3%       |       |
| <i>Other</i>                                                          | 4.9%        | 16.5%       |       |
| <i>Unknown</i>                                                        | 6.6%        | 20.7%       |       |
| Mean fractional hemoglobin<br>S levels (SD)                           | -           | 37.0 (±4.3) |       |
| Hemoglobin F > 0.4%                                                   | -           | 24.7%       |       |
| Mean fractional hemoglobin<br>A levels (SD)                           | -           | 59.4 (±4.4) |       |
| Mean fractional hemoglobin<br>A <sub>2</sub> levels (SD)              | -           | 3.2 (±0.7)  |       |

SCT – sickle cell trait. ACEi/ARBs – angiotensin converting enzyme inhibitors or angiotensin receptor blockers. eGFR – estimated glomerular filtration rate (using Chronic Kidney Disease Epidemiology Collaboration [CKD-EPI] creatinine equation). Urine ACR – urine albumin: creatinine ratio. \*Missing data: hemoglobin (5 reference, 8 SCT), leukocyte count (441 reference, 224 SCT), hemoglobin S (21), hemoglobin F (76), hemoglobin A (22) and hemoglobin A<sub>2</sub> (73).

**S1b.** Baseline characteristics of sickle cell disease sensitivity analysis cohort.

| <b>Variable</b>                                                    | <b>Reference<br/>N = 677</b> | <b>SCD<br/>N = 229</b> | <b>p value</b> |
|--------------------------------------------------------------------|------------------------------|------------------------|----------------|
| <b>Demographics</b>                                                |                              |                        |                |
| Mean age (SD), years                                               | 33 ( $\pm$ 12)               | 33 ( $\pm$ 12)         | 0.74           |
| Age $\geq$ 65 years                                                | 0.4%                         | 0.4%                   | 0.99           |
| Female                                                             | 50%                          | 51%                    | 0.85           |
| Median follow up (IQR), years                                      | 8 (4 to 11)                  | 7 (4 to 11)            | 0.94           |
| <b>Comorbidities</b>                                               |                              |                        |                |
| Hypertension                                                       | 14%                          | 11%                    | 0.30           |
| Diabetes mellitus                                                  | 8%                           | 10%                    | 0.58           |
| Cardiovascular disease                                             | 9%                           | 28%                    | <0.01          |
| Smoking                                                            |                              |                        | <0.01          |
| <i>Never</i>                                                       | 47%                          | 40%                    |                |
| <i>Ever</i>                                                        | 15%                          | 9%                     |                |
| <i>Missing</i>                                                     | 38%                          | 51%                    |                |
| AKI                                                                | 8.0%                         | 25.3%                  | <0.01          |
| <b>Medications</b>                                                 |                              |                        |                |
| ACEi/ARBs                                                          | 15%                          | 21%                    | 0.05           |
| Aspirin                                                            | 2%                           | 3%                     | 0.34           |
| Statins                                                            | 12%                          | 12%                    | 0.91           |
| Hydroxyurea                                                        | 0.3%                         | 47.6%                  | <0.01          |
| <b>Laboratory values</b>                                           |                              |                        |                |
| Mean eGFR (SD), ml/min/1.73m <sup>2</sup>                          | 114 ( $\pm$ 25)              | 128 ( $\pm$ 32)        | <0.01          |
| eGFR categories                                                    |                              |                        | <0.01          |
| $\geq 120$ ml/min/1.73m <sup>2</sup>                               | 42%                          | 66%                    |                |
| 90 – 119 ml/min/1.73m <sup>2</sup>                                 | 42%                          | 22%                    |                |
| 60 – 89 ml/min/1.73m <sup>2</sup>                                  | 14%                          | 8%                     |                |
| 30 – 60 ml/min/1.73m <sup>2</sup>                                  | 2%                           | 4%                     |                |
| Urine ACR                                                          |                              |                        | 0.99           |
| <30mg/g                                                            | 1%                           | 1%                     |                |
| 30-299mg/g                                                         | 0%                           | 0%                     |                |
| >300mg/g                                                           | 0%                           | 0%                     |                |
| <i>Missing</i>                                                     | 99%                          | 99%                    |                |
| Mean hemoglobin* (SD), g/dL                                        | 13 ( $\pm$ 2)                | 10 ( $\pm$ 2)          | <0.01          |
| Mean leukocyte count (SD)*, x10 <sup>5</sup> cells/mm <sup>3</sup> | 7.5 ( $\pm$ 4.2)             | 12.2 ( $\pm$ 6.4)      | <0.01          |

SCD – sickle cell disease. ACEi/ARBs – angiotensin converting enzyme inhibitors or angiotensin receptor blockers. eGFR – estimated glomerular filtration rate (using Chronic Kidney Disease Epidemiology Collaboration [CKD-EPI] creatinine equation). Urine ACR – urine albumin: creatinine ratio. \*Missing data: hemoglobin (2 reference, 0 SCD), leukocyte count (128 reference, 18 SCD).

**S2.** Difference in mean eGFR change per year in sickle cell trait and sickle cell disease compared to the reference in the sensitivity analysis cohort.

| Exposure             | Median eGFR values (IQR) | Unadjusted $\beta$ , 95% CI ml/min/1.73m <sup>2</sup> per year | *Adjusted $\beta$ , 95% CI ml/min/1.73m <sup>2</sup> per year |
|----------------------|--------------------------|----------------------------------------------------------------|---------------------------------------------------------------|
| <b>SCT Reference</b> | 18 (10-34)               | 0                                                              | 0                                                             |
| <b>SCT</b>           | 19 (10-33)               | -0.48 (-0.54 to -0.41)                                         | -0.47 (-0.53 to -0.41)                                        |
| <b>SCD Reference</b> | 14 (7-25)                | 0                                                              | 0                                                             |
| <b>SCD</b>           | 48 (22-125)              | -1.07 (-1.20 to -0.94)                                         | -1.09 (-1.22 to -0.97)                                        |
| <b>SCD vs SCT</b>    | -                        | -0.85 (-0.94 to -0.76)                                         | -0.88 (-0.97 to -0.79)                                        |

SCT – sickle cell trait. SCD – sickle cell disease. \*Adjusted for baseline age, sex, hypertension, diabetes mellitus, history of cardiovascular disease, smoking status, acute kidney injury, ACEi/ARB use, urine albumin: creatinine ratio categories and baseline eGFR. SCT model was adjusted for hemoglobin electrophoresis indication.

**S3.** Baseline characteristics of cohort with baseline eGFR  $\geq 65$  ml/min/1.73m<sup>2</sup>

| Variable                                  | Reference<br>N = 8,376 | SCT<br>N = 1,141 | p<br>value | SCD<br>N = 216   | p<br>value |
|-------------------------------------------|------------------------|------------------|------------|------------------|------------|
| <b>Demographics</b>                       |                        |                  |            |                  |            |
| Mean age (SD), years                      | 35 ( $\pm 11$ )        | 38 ( $\pm 13$ )  | <0.01      | 32 ( $\pm 11$ )  | <0.01      |
| Age $\geq 65$ years                       | 2%                     | 4%               | <0.01      | 0%               | 0.03       |
| Female                                    | 89%                    | 80%              | <0.01      | 50%              | <0.01      |
| Median follow up (IQR), years             | 8( $\pm 4$ )           | 8( $\pm 4$ )     | 0.41       | 8( $\pm 4$ )     | 0.31       |
| <b>Comorbidities</b>                      |                        |                  |            |                  |            |
| Hypertension                              | 18%                    | 26%              | <0.01      | 9%               | <0.01      |
| Diabetes mellitus                         | 14%                    | 21%              | <0.01      | 8%               | 0.01       |
| Cardiovascular disease                    | 8%                     | 12%              | <0.01      | 26%              | <0.01      |
| Smoking                                   |                        |                  | <0.01      |                  | <0.01      |
| <i>Never</i>                              | 50%                    | 45%              |            | 40%              |            |
| <i>Ever</i>                               | 16%                    | 14%              |            | 9%               |            |
| <i>Missing</i>                            | 34%                    | 41%              |            | 51%              |            |
| AKI                                       | 5.3%                   | 8.4%             | <0.01      | 22.2%            | <0.01      |
| <b>Medications</b>                        |                        |                  |            |                  |            |
| ACEi/ARBs                                 | 18%                    | 24%              | <0.01      | 19%              | 0.71       |
| Aspirin                                   | 20%                    | 24%              | <0.01      | 34%              | <0.01      |
| Statins                                   | 13%                    | 29%              | <0.01      | 10%              | 0.13       |
| Hydroxyurea                               | 0.1%                   | 0.3%             | 0.34       | 49.5%            | <0.01      |
| <b>Laboratory values</b>                  |                        |                  |            |                  |            |
| Mean eGFR (SD), ml/min/1.73m <sup>2</sup> | 117 ( $\pm 24$ )       | 108 ( $\pm 23$ ) | <0.01      | 133 ( $\pm 27$ ) | <0.01      |
| eGFR categories                           |                        |                  | <0.01      |                  | <0.01      |
| $\geq 120$ ml/min/1.73m <sup>2</sup>      | 47                     | 32               |            | 69               |            |
| 90 – 119 ml/min/1.73m <sup>2</sup>        | 37                     | 43               |            | 23               |            |

|                                        |             |             |       |            |       |
|----------------------------------------|-------------|-------------|-------|------------|-------|
| 65 – 89 ml/min/1.73m <sup>2</sup>      | 16          | 24          |       | 8          |       |
| Urine ACR                              |             |             | <0.01 |            | 0.33  |
| <30mg/g                                | 2%          | 2%          |       | 0%         |       |
| 30-299mg/g                             | 0%          | 1%          |       | 0%         |       |
| >300mg/g                               | 0%          | 0%          |       | 0%         |       |
| Missing                                | 98%         | 97%         |       | 100%       |       |
| Hemoglobin*                            | 12.1 (±1.6) | 12.3 (±1.6) | <0.01 | 9.7 (±2.1) | <0.01 |
| Hemoglobin electrophoresis indications |             |             | <0.01 |            |       |
| Anemia                                 | 37.8%       | 22.6%       |       | -          | -     |
| Perinatal testing                      | 53.6%       | 41.5%       |       | -          | -     |
| Other                                  | 3.3%        | 16.3%       |       | -          | -     |
| Unknown                                | 5.3%        | 19.6%       |       | -          | -     |

SCT – sickle cell trait. SCD – sickle cell disease. ACEi/ARBs – angiotensin converting enzyme inhibitors or angiotensin receptor blockers. eGFR – estimated glomerular filtration rate (using Chronic Kidney Disease Epidemiology Collaboration [CKD-EPI] creatinine equation). Urine ACR – urine albumin: creatinine ratio. \*Missing data: hemoglobin (13 reference, 8 SCT and 0 SCD).

**S4.** Association of sickle cell trait and sickle cell disease with incident stage 3 chronic kidney disease using sensitivity analysis cohort.

| Exposure             | Events, n (%) | Unadjusted (HR; 95% CI) | Adjusted* (HR; 95% CI) |
|----------------------|---------------|-------------------------|------------------------|
| <b>SCT Reference</b> | 254 (11%)     | 1                       | 1                      |
| <b>SCT</b>           | 151 (13%)     | 1.25 (1.02 to 1.53)     | 1.15 (0.91 to 1.44)    |
| <b>SCD Reference</b> | 26 (4%)       | 1                       | 1                      |
| <b>SCD</b>           | 16 (7%)       | 2.10 (1.12 to 3.93)     | 2.51 (1.24 to 5.10)    |

SCT – sickle cell trait. SCD – sickle cell disease. \*Adjusted for baseline age, sex, hypertension, diabetes mellitus, history of cardiovascular disease, smoking status, acute kidney injury, ACEi/ARB use, urine albumin: creatinine ratio categories and baseline eGFR. SCT was also adjusted for hemoglobin electrophoresis indications.

**S5.** Unadjusted and adjusted coefficients of the difference in mean eGFR change per year in sickle cell disease by severity.

| Exposure                | Number of eGFR values (IQR) | Unadjusted $\beta$ , 95% CI ml/min/1.73m <sup>2</sup> per year | *Adjusted $\beta$ , 95% CI ml/min/1.73m <sup>2</sup> per year |
|-------------------------|-----------------------------|----------------------------------------------------------------|---------------------------------------------------------------|
| <b>Reference</b>        | 17 (10-29)                  | 0                                                              | 0                                                             |
| <b>SCD - severe</b>     | 84 (29-158)                 | -1.70 (-1.78 to -1.62)                                         | -1.71 (-1.79 to -1.63)                                        |
| <b>SCD – non severe</b> | 31 (17-54)                  | 0.47 (0.32 to 0.63)                                            | 0.45 (0.29 to 0.60)                                           |

\*Adjusted for baseline age, sex, hypertension, diabetes mellitus, history of cardiovascular disease, smoking status, acute kidney injury, ACEi/ARB use, urine albumin: creatinine ratio categories and baseline eGFR.

**S6.** Adjusted coefficients describing mean annual change in eGFR by baseline eGFR category in

reference, sickle cell trait, and sickle cell disease patients.

| <b>Baseline eGFR category</b>           | <b>Reference <math>\beta</math> (95% CI) ml/min/1.73m<sup>2</sup> per year</b> | <b>SCT <math>\beta</math> (95% CI) ml/min/1.73m<sup>2</sup> per year</b> | <b>SCD <math>\beta</math> (95% CI) ml/min/1.73m<sup>2</sup> per year</b> |
|-----------------------------------------|--------------------------------------------------------------------------------|--------------------------------------------------------------------------|--------------------------------------------------------------------------|
| All                                     | -1.21<br>(-1.23 to -1.19)                                                      | -1.64<br>(-1.69 to -1.59)                                                | -2.48<br>(-2.56 to -2.40)                                                |
| $\geq 120$<br>ml/min/1.73m <sup>2</sup> | -1.69<br>(-1.73 to -1.66)                                                      | -1.57<br>(-1.70 to -1.45)                                                | -2.47<br>(-2.56 to -2.38)                                                |
| 90-119<br>ml/min/1.73m <sup>2</sup>     | -0.87<br>(-0.90 to -0.83)                                                      | -1.88<br>(-1.98 to -1.79)                                                | -2.85<br>(-3.06 to -2.64)                                                |
| 60-89<br>ml/min/1.73m <sup>2</sup>      | -1.03<br>(-1.07 to -0.98)                                                      | -1.53<br>(-1.61 to -1.46)                                                | -1.60<br>(-2.08 to -1.13)                                                |
| < 60<br>ml/min/1.73m <sup>2</sup>       | -1.08<br>(-1.15 to -1.02)                                                      | -1.38<br>(-1.49 to -1.28)                                                | 0.60**<br>(-0.14 to 1.34)                                                |

SCT – sickle cell trait. SCD – sickle cell disease. ACEi/ARBs – angiotensin converting enzyme inhibitors or angiotensin receptor blockers. eGFR – estimated glomerular filtration rate (using Chronic Kidney Disease Epidemiology Collaboration [CKD-EPI] creatinine equation). Urine ACR – urine albumin: creatinine ratio. \*All coefficients were adjusted for baseline age, sex, hypertension, diabetes mellitus, history of cardiovascular disease, smoking status, acute kidney injury, ACEi/ARB use, and urine albumin: creatinine ratio categories. Reference and SCT were also adjusted for hemoglobin electrophoresis indications. SCD was also adjusted for hydroxyurea.

\*\*Only 9 patients.

## APPENDIX

### **Algorithms for adjudicating covariates using ICD codes**

#### Cardiovascular disease: coronary artery disease

The presence of at least 2 diagnosis codes during follow-up was required. We used the following codes: 410.x, 411.x, I20.0, I21.x, I24.x, I25.1x, I25.7x. These codes were evaluated on a subset of African 696 American CKD patients from the Partners RPDR database with coronary artery disease confirmed on chart review (using results of cardiac catheterizations, stress tests and/or physician documentation of a myocardial infarction).

Sensitivity: 81%, Specificity: 81%, negative predictive value (NPV): 93%, positive predictive value (PPV): 57%

#### Cardiovascular disease: stroke

The presence of at least 2 diagnosis codes during follow-up was required. We used the following codes: 362.30, 362.31, 362.32, 362.33, 362.34, 433.x, 434.x, 435.x, 436.x, 431.x, G45.x, H34.1x, I63.x, I65.x, I61.x. These codes were evaluated on a subset of 696 African American CKD patients from the Partners RPDR database with stroke confirmed on chart review (using brain imaging radiology reports and/or physician documentation of hemorrhagic or embolic stroke).

Sensitivity: 87%, Specificity: 88%, NPV: 97%, PPV: 59%

#### Hypertension

The presence of at least 15 diagnosis codes at different times during follow-up was required. We used the following codes: 997.91, 401.0, 401.1, 401.9, 402.00, 402.01, 402.10, 402.91, 402.90, 403.01, 403.00, 404.01, 404.03, 404.91, 404.92, 404.93, 404.11, 404.13, 404.12, 404.10, 402.11, 403.11, 403.10, I10.x, I11.x, I12.x, I13.x, I15.x. These codes were evaluated on a subset of 696

African American CKD patients from the Partners RPDR database with hypertension confirmed on chart review (using multiple physician notes).

Sensitivity: 80%, Specificity: 76%, NPV: 36%, PPV: 96%

#### Diabetes mellitus

The presence of at least 5 diagnosis codes at different times during follow-up was required. We used the following codes: 250.x, E10.x, E11.x, E12.x, E13.x, E14.x. These codes were evaluated on a subset of 696 African American CKD patients from the Partners RPDR database with diabetes mellitus confirmed on chart review (using multiple physician notes).

Sensitivity: 98%, Specificity: 82%, NPV: 97%, PPV: 86%

#### Acute Kidney Injury

The presence of at least one diagnosis code was required. We used the following codes: 584.x and N17.x.

Sensitivity: 17%, Specificity: 99.6%, NPV: 92%, PPV: 81.8% (Grams, Morgan E., et al.

“Performance and Limitations of Administrative Data in the Identification of AKI.” *Clinical Journal of the American Society of Nephrology : CJASN*, vol. 9, no. 4, American Society of Nephrology, Apr. 2014, pp. 682–89).

#### Sickle cell crisis and acute chest syndrome

The presence of at least one diagnosis code was required. We used the following codes:

282.62, 282.64, 282.42, 282.69, 517.3, D57.0\*, D57.21\*, D57.41\*, D57.81\*.

Vaso-occlusive crisis codes: Sensitivity: 91.8%, Specificity: 75%, NPV: 94.1%, PPV: 67.7%

Acute chest syndrome codes: Sensitivity: 92.6%, Specificity: 98%, NPV: 99.5%, PPV: 75%

(Ting, Michelle, et al. “Accuracy of Administrative Coding for Sickle Cell Disease.” *Blood*, vol. 126, no. 23, 2015).



## **Sickle Cell Disease Phenotypes and Categorization**

Hgb SS – n = 139 (60.4%)

Hgb SC – n = 72 (31.3%)

HGB S-beta thalassemia zero – n = 3 (1.3%)

Hgb S-beta thalassemia trait – n = 14 (6.1%)

Hgb SG – n = 2 (0.9%)

Severe phenotype – Hgb SS and Hgb S-beta thalassemia zero

Non-severe phenotype – Hgb SC, Hgb S-beta thalassemia trait and Hgb SG.

## **Indications for hemoglobin electrophoresis testing**

|                                                                                                                                                     |               |
|-----------------------------------------------------------------------------------------------------------------------------------------------------|---------------|
| Anemia                                                                                                                                              | 36.7% (3,743) |
| Routine perinatal/early pregnancy/infertility/reproductive partner testing in sickle cell pregnancy                                                 | 48.9% (4,992) |
| Abnormal complete blood count (microcytosis, macrocytosis or high red blood cell count)                                                             | 2.0% (208)    |
| Other abnormal labs (rhabdmyolysis, unexplained elevated liver function tests)                                                                      | 1% (99)       |
| Family history of sickle cell disorders                                                                                                             | 0.9% (88)     |
| Rule out sickle cell disorders as etiology of acute presentations (hypercoagulable workup, recurrent gallstones, papillary necrosis, bone infarct). | 0.9% (91)     |
| Other reasons in an otherwise healthy patient (athlete, pre-employment).                                                                            | 0.2% (24)     |
| Unknown (no documentation of indication and no abnormal labs at time of testing).                                                                   | 7.2% (735)    |
| Sickle cell disease                                                                                                                                 | 2.2% (230)    |
